# Supplementary material for: Contribution of the different omega-3 fatty acid desaturase genes to the cold response in soybean
Source: PubMed Central journal article supplement — J Exp Bot. 2012 Aug 14;63(13):4973–82. doi: 10.1093/jxb/ers174 (PMC3427996; doi:10.1093/jxb/ers174), 2012-08-14
Supplement: supp_ers174_00075432_file001.pdf [file supp_ers174_00075432_file001.pdf]

**Contribution of the different omega-3 fatty acid desaturases to the modifications of glycerolipid fatty acid composition in response to cold in soybean**

*Ángela Román, Vanesa Andreu, Luisa Hernández, Beatriz Lagunas, Rafael Picorel, José Manuel Martínez-Rivas, and Miguel Alfonso*

**Supplementary Material**

**Table S1.** Gene specific primers used in this study

| Gene                 | Forward/<br>Reverse | Primer sequence 5'→3'        | Size (bp) | Tm (°C) |
|----------------------|---------------------|------------------------------|-----------|---------|
| <i>GmFAD3</i><br>A+B | F                   | GCAATGGTTAAAGACACAAAGCCT     | 1142      | 59      |
|                      | R                   | ACTCAGTCTCGGTGCGAGTG         |           |         |
| <i>GmFAD3C</i>       | F                   | GAGGATCCAAATGGTTCAAGCACAG    | 1154      | 70      |
|                      | R                   | GAActCGAGTTTAGTTGGACTGGGTCC  |           |         |
| <i>GmFAD7-1</i>      | F                   | GGATATTATCAGAATGTGGCTTGAAGC  | 767       | 52      |
|                      | R                   | CCTACTAAAAAGGTACACAGGAAA     |           |         |
| <i>GmFAD7-2</i>      | F                   | GGA/GTATTATCAGAATGTA/GGCTTGA | 765       | 56      |
|                      | R                   | CCCCAAAGGTACACGGGATATGC      |           |         |
| <i>GmFAD8-1</i>      | F                   | AAGTTGTGTTCTGTTGTGAATATCT    | 512       | 57      |
|                      | R                   | TCCTCAACAACCCATTAGC          |           |         |
| <i>GmFAD8-2</i>      | F                   | TATACCAGTTGTCAATTTGTCATATC   | 507       | 57      |
|                      | R                   | CTCACCAACCCATTATTAGC         |           |         |
| <i>GmACTIN</i>       | F                   | ATTGTAGGTCGTCCTCGTC          | 334       | 46      |
|                      | R                   | TTGCATAAAGTGAAAGAACAG        |           |         |
| <i>GmSCOF-1</i>      | F                   | CCGCTACAGCCACAGCCACA         | 344       | 59      |
|                      | R                   | CCTTCCGAGGCGACGGTGAC         |           |         |

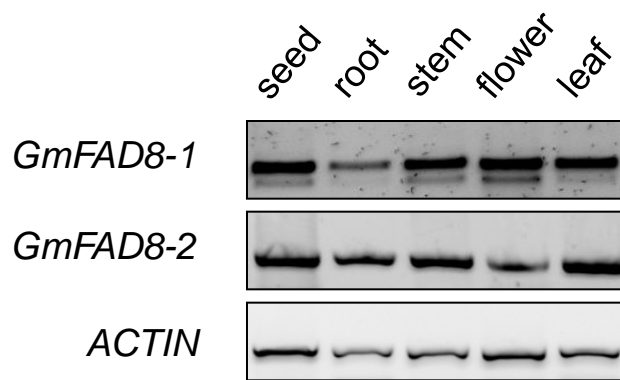

Fig. S1. Tissue-specific expression of *GmFAD8-1* and *GmFAD8-2* genes in soybean plants. Total RNA was extracted from seed, root, stem, flower and leaf. PCR reactions were performed with the gene specific primers of TableS1. *ACTIN* was used as housekeeping gene.

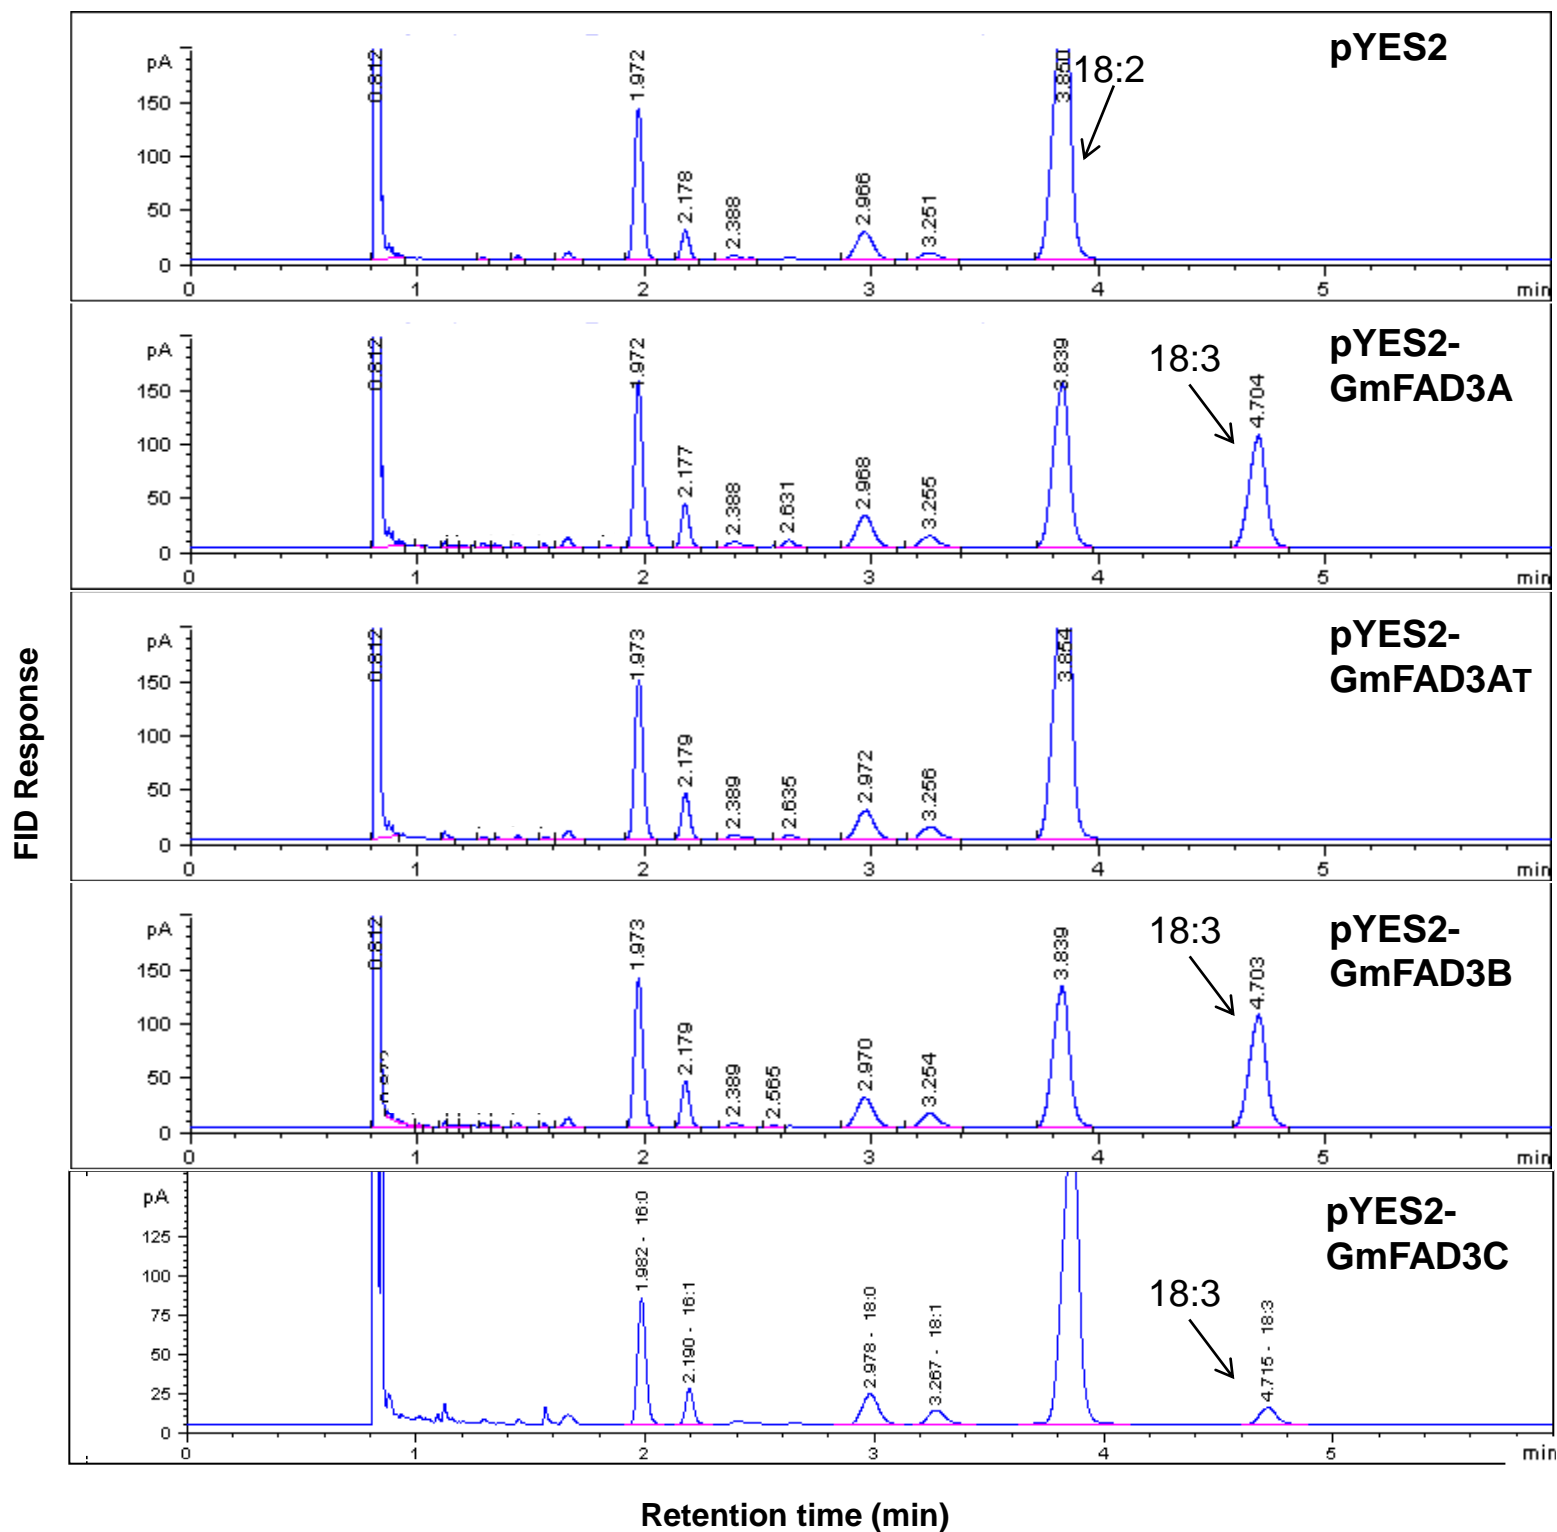

Fig.S2 Román et al.

Fig. S2. GC-FID chromatograms showing the fatty acid profile obtained in yeast transformants containing the different constructions corresponding to each of the *GmFAD3* isoforms detected in the soybean genome as well as the truncated form of *GmFAD3A*. The peak corresponding to 18:3 is indicated with an arrow.
